# Supplementary material for: 2FAST2Q: a general-purpose sequence search and counting program for FASTQ files
Source: PeerJ journal article supplement (doi:10.7717/peerj.14041), 2022-10-25
Supplement: sup_fig1.pdf [file sup_fig1.pdf]

Version: 2.3.4

Running in align and count mode with the following parameters:

0 mismatch allowed

Minimal Phred Score per bp >= 30

Feature length: 20

Read alignment start position: 0

All data will be saved into C:/Users/afons/Downloads/bikard\_fastq/2FAST2Q\_output\_2021\_11\_24\_10\_49\_13\2FAST2Q\_output\_2021\_12\_20\_13\_17\_45

Loading Features

11629 different features were provided.

Processing 118 files. Please hold.

|                                |            |  |                    |               |                          |
|--------------------------------|------------|--|--------------------|---------------|--------------------------|
| Processing file 4 out of 118:  | 63% #####7 |  | 90870601/143945160 | [00:05<00:03, | 16673030.70characters/s] |
| Processing file 12 out of 118: | 5% #1      |  | 14787364/298122739 | [00:00<00:17, | 16509475.69characters/s] |
| Processing file 6 out of 118:  | 50% #####3 |  | 87087627/175743839 | [00:05<00:05, | 16110963.00characters/s] |
| Processing file 11 out of 118: | 9% ##2     |  | 26539623/284003755 | [00:01<00:15, | 16497925.05characters/s] |
| Processing file 3 out of 118:  | 79% #####7 |  | 89092403/112897070 | [00:05<00:01, | 16359410.16characters/s] |
| Processing file 5 out of 118:  | 58% #####5 |  | 90612488/155978997 | [00:05<00:03, | 16974129.56characters/s] |
| Processing file 9 out of 118:  | 37% #####2 |  | 86665482/234426059 | [00:05<00:08, | 16576674.86characters/s] |
| Processing file 7 out of 118:  | 47% #####6 |  | 88797884/189768453 | [00:05<00:06, | 16529244.99characters/s] |
| Processing file 10 out of 118: | 35% #####3 |  | 90829008/262005192 | [00:05<00:09, | 17453406.44characters/s] |
| Processing file 8 out of 118:  | 44% #####  |  | 86629758/195837051 | [00:05<00:06, | 16187016.99characters/s] |
