# Supplementary material for: 2FAST2Q: a general-purpose sequence search and counting program for FASTQ files
Source: PeerJ journal article supplement (doi:10.7717/peerj.14041), 2022-10-25
Supplement: sup_fig2.pdf [file sup_fig2.pdf]

Conversion from  
string to  
corresponding  
integer 8 format

|    |    |    |
|----|----|----|
| A  | T  | G  |
| 65 | 84 | 71 |

|    |    |    |
|----|----|----|
| A  | T  | C  |
| 65 | 84 | 67 |

position wise  
subtraction

|       |       |       |
|-------|-------|-------|
| 65-65 | 84-84 | 71-67 |
|-------|-------|-------|

The non 0 result  
position is the  
mismatch location

|   |   |   |
|---|---|---|
| 0 | 0 | 4 |
|---|---|---|
