# Supplementary material for: 2FAST2Q: a general-purpose sequence search and counting program for FASTQ files
Source: PeerJ journal article supplement (doi:10.7717/peerj.14041), 2022-10-25

Read abundance correlation between sgRNAs

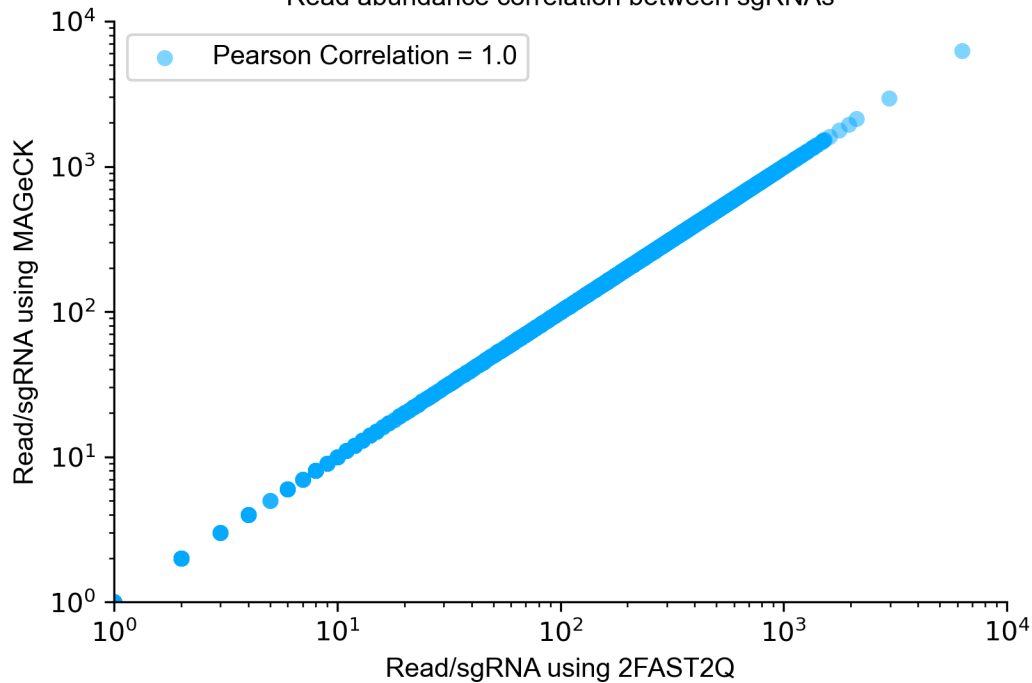

Supplement: sup_fig3.pdf [file sup_fig3.pdf]
